# Supplementary material for: Expression of BAFF receptors in muscle tissue of myositis patients with anti-Jo-1 or anti-Ro52/anti-Ro60 autoantibodies
Source: Springer Nature journal article supplement (doi:10.1186/s13075-014-0454-8), 2014-10-09

# Additional figure 2

**A**

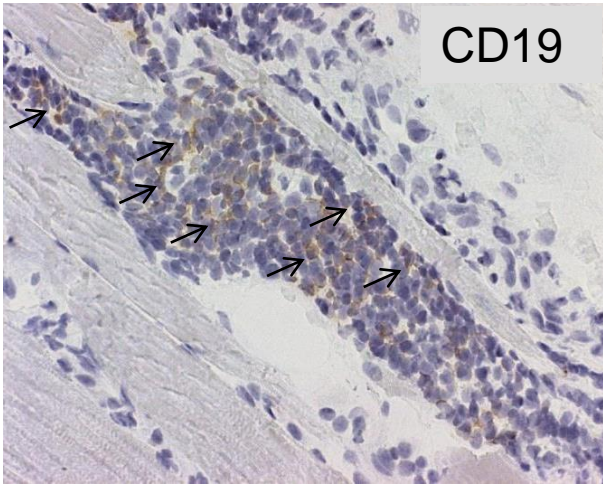

**B**

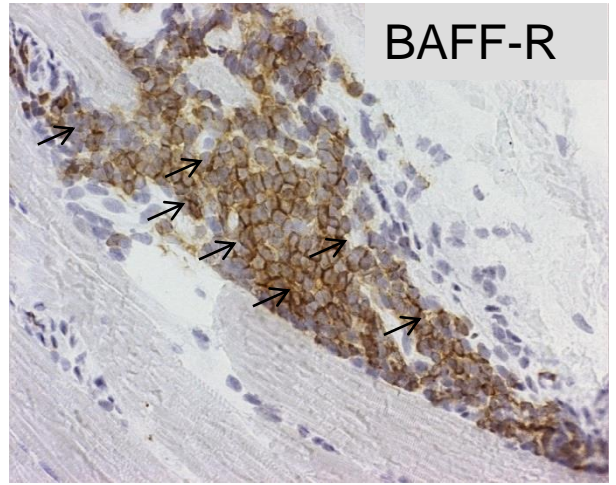

**C**

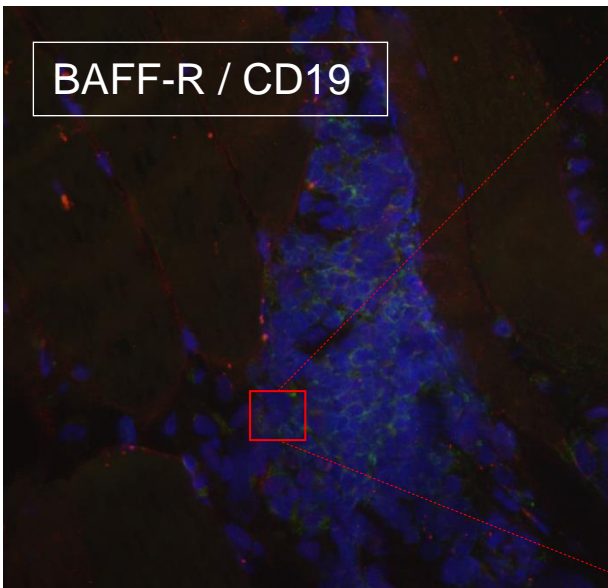

**D**

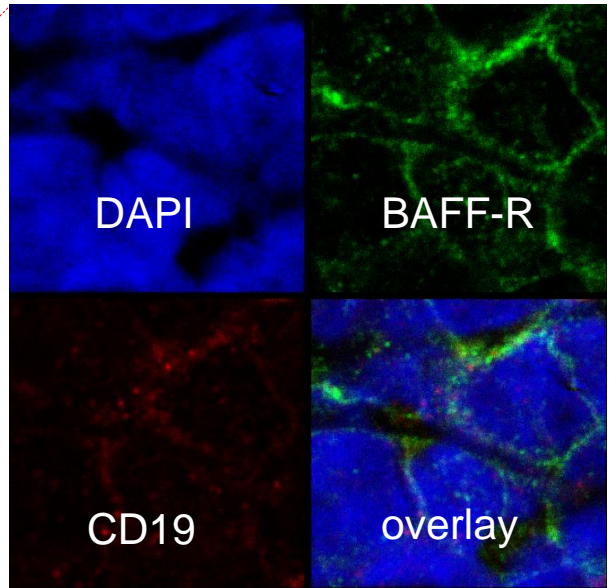

Supplement: MOESM2 [file 9783336]
